# Supplementary material for: The activation of AIM2/Caspase-1/GSDMD pathway contributes to pyroptosis of keratinocytes in Stevens-Johnson syndrome/toxic epidermal necrolysis
Source: Research Square preprint supplement (doi:10.21203/rs.3.rs-2447588/v1), 2023-01-17
Supplement: Supplementary file 1 [file bed011968c74943b556f8638.pdf]

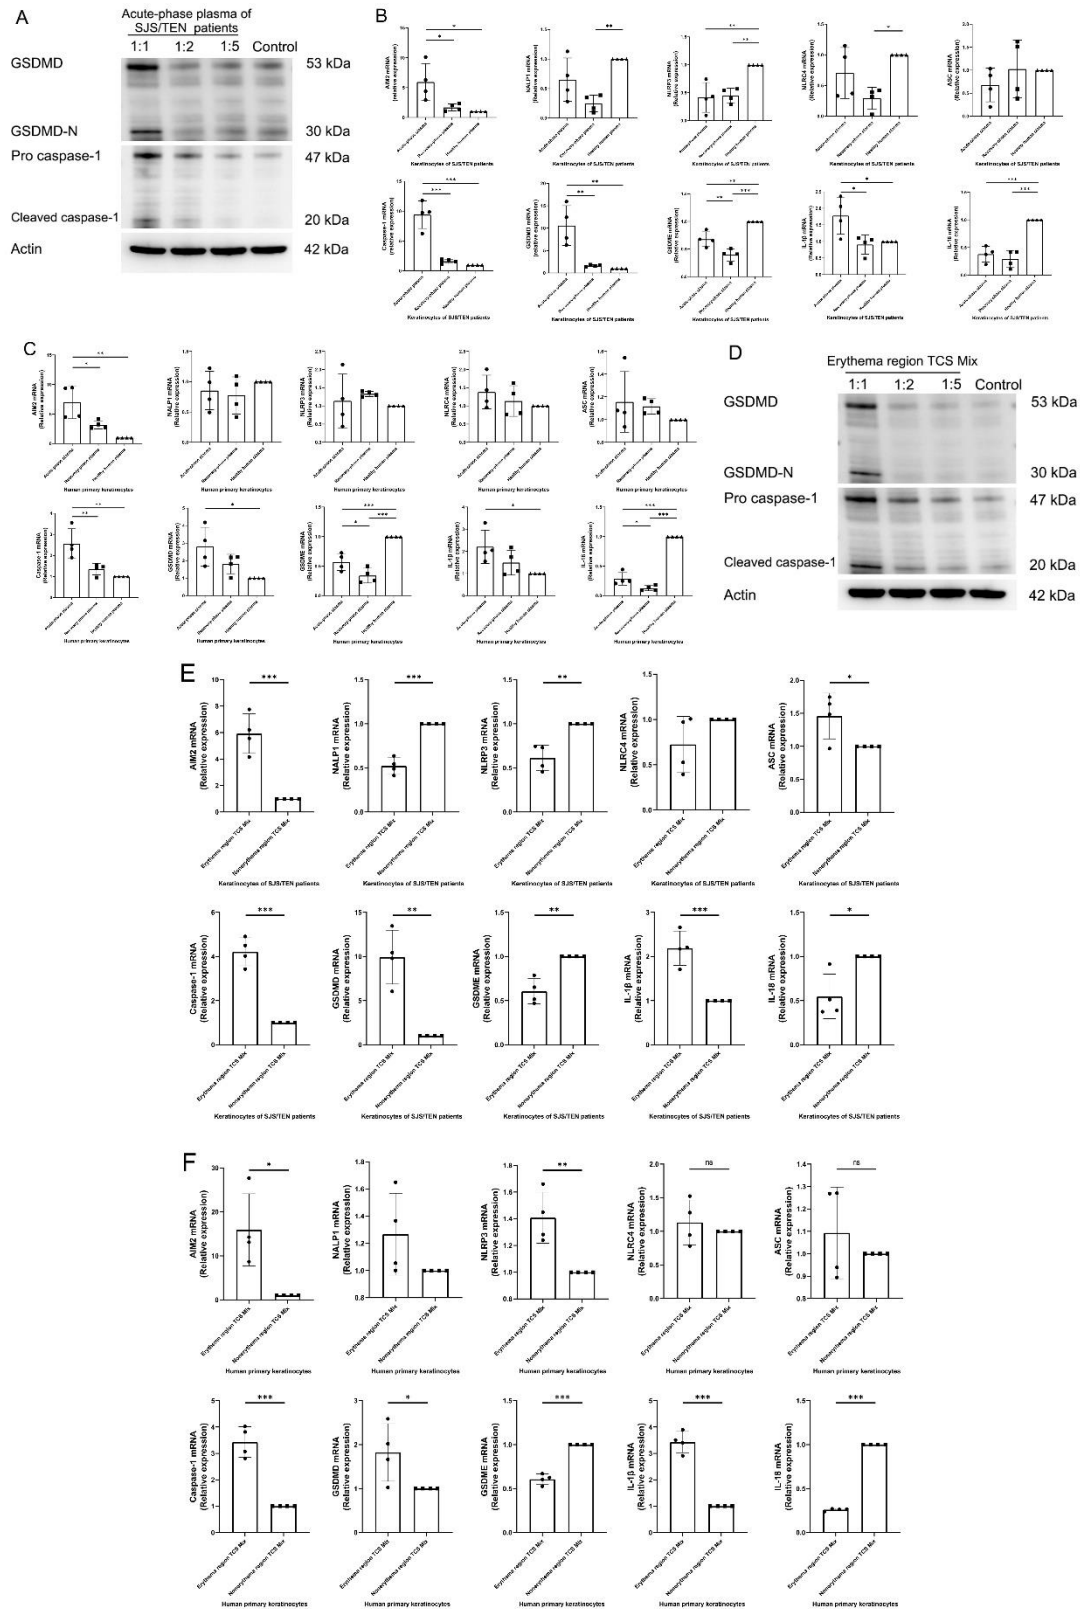

Fig. S1 Acute-phase plasma or TCS mix from erythematous lesions induce the expression of pyroptosis related genes in SJS/TEN keratinocytes but not in healthy human primary keratinocytes in vitro. A The acute-plasma was diluted with culture medium to achieve different concentrations and then was used as cell death stimulus. Protein levels of caspase-1 and GSDMD in SJS/TEN keratinocytes and healthy human primary keratinocytes stimulated by plasma (n=3 per group) were

quantified by western blotting. Actin was used as the loading control. B, C mRNA expression levels of NLRP1, AIM2, NLRP3, NLRC4, ASC, caspase-1, GSDMD, GSDME, IL-1 $\beta$  and IL-18 in SJS/TEN keratinocytes and healthy human primary keratinocytes stimulated by plasma (n=4 per group) were analyzed by qRT-PCR. Data were normalized to actin mRNA expression. D The TCS mix from SJS/TEN erythematous lesions was diluted with culture medium to achieve different concentrations and then was used as cell death stimulus. Protein levels of caspase-1 and GSDMD in SJS/TEN keratinocytes and healthy human primary keratinocytes stimulated by TCS mix (n=3 per group) were quantified by western blotting. Actin was used as the loading control. E, F mRNA expression levels of NALP1, AIM2, NLRP3, NLRC4, ASC, caspase-1, GSDMD, GSDME, IL-1 $\beta$  and IL-18 in SJS/TEN keratinocytes and healthy human primary keratinocytes stimulated by TCS mix (n=4 per group) were analyzed by qRT-PCR. Data were normalized to actin mRNA expression.

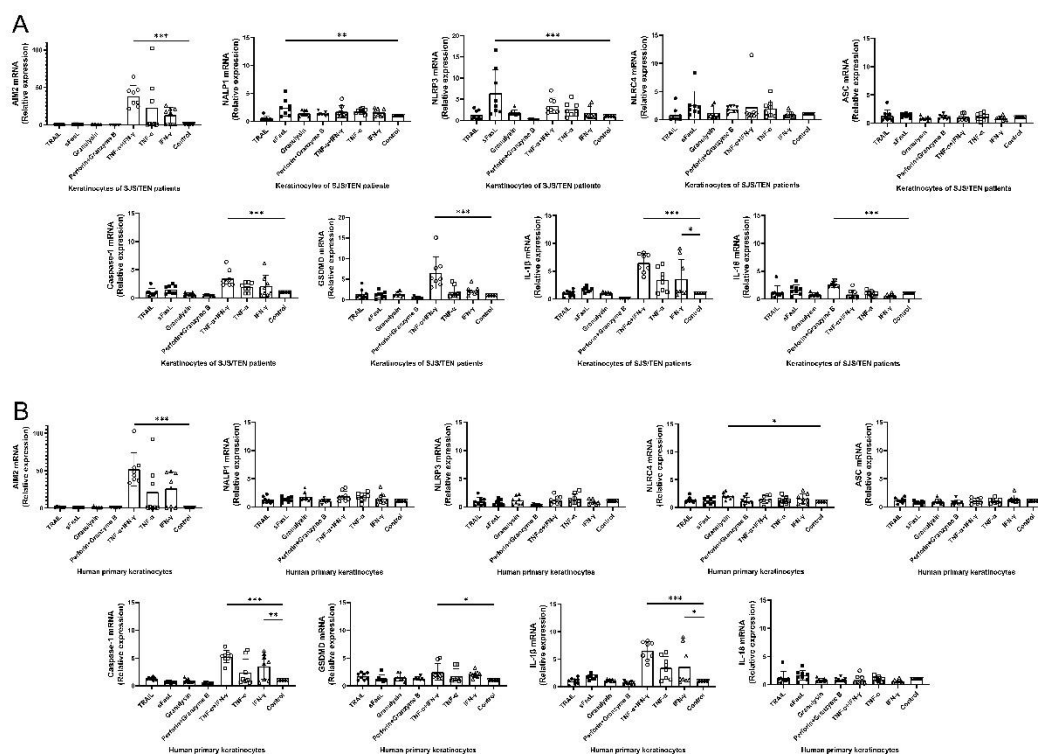

Fig. S2 The mRNA expression levels of AIM2, caspase-1, GSDMD and IL-1 $\beta$  were increased in keratinocytes stimulated by TNF- $\alpha$  combined with IFN- $\gamma$ . A, B mRNA expression levels of NALP1, AIM2, NLRP3, NLRC4, ASC, caspase-1, GSDMD, IL-1 $\beta$  and IL-18 in SJS/TEN keratinocytes and healthy human primary keratinocytes stimulated by several soluble factors (n=8 per group) were analyzed by qRT-PCR. Data were normalized to actin mRNA expression.

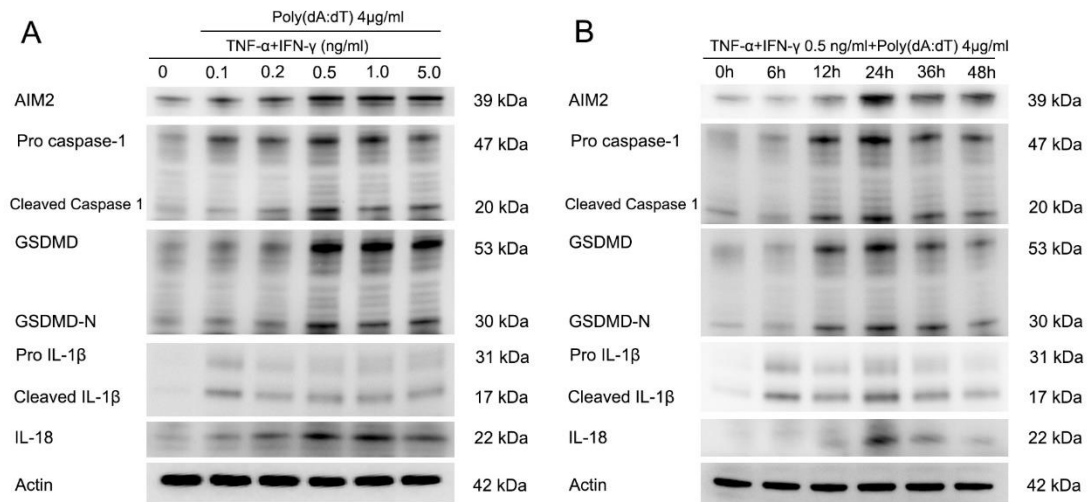

Fig. S3 Comparison of stimulation with different periods of time or various concentrations of TNF- $\alpha$  and IFN- $\gamma$  in human primary keratinocytes. A Human primary keratinocytes treated with varying concentrations of TNF- $\alpha$  and IFN- $\gamma$  for 24h, protein levels of caspase-1 and GSDMD were quantified by western blotting. Actin was used as the loading control. B Human primary keratinocytes treated with TNF- $\alpha$  combined with IFN- $\gamma$  (0.5ng/mL) for various durations, protein levels of caspase-1 and GSDMD were quantified by western blotting. Actin was used as the loading control.

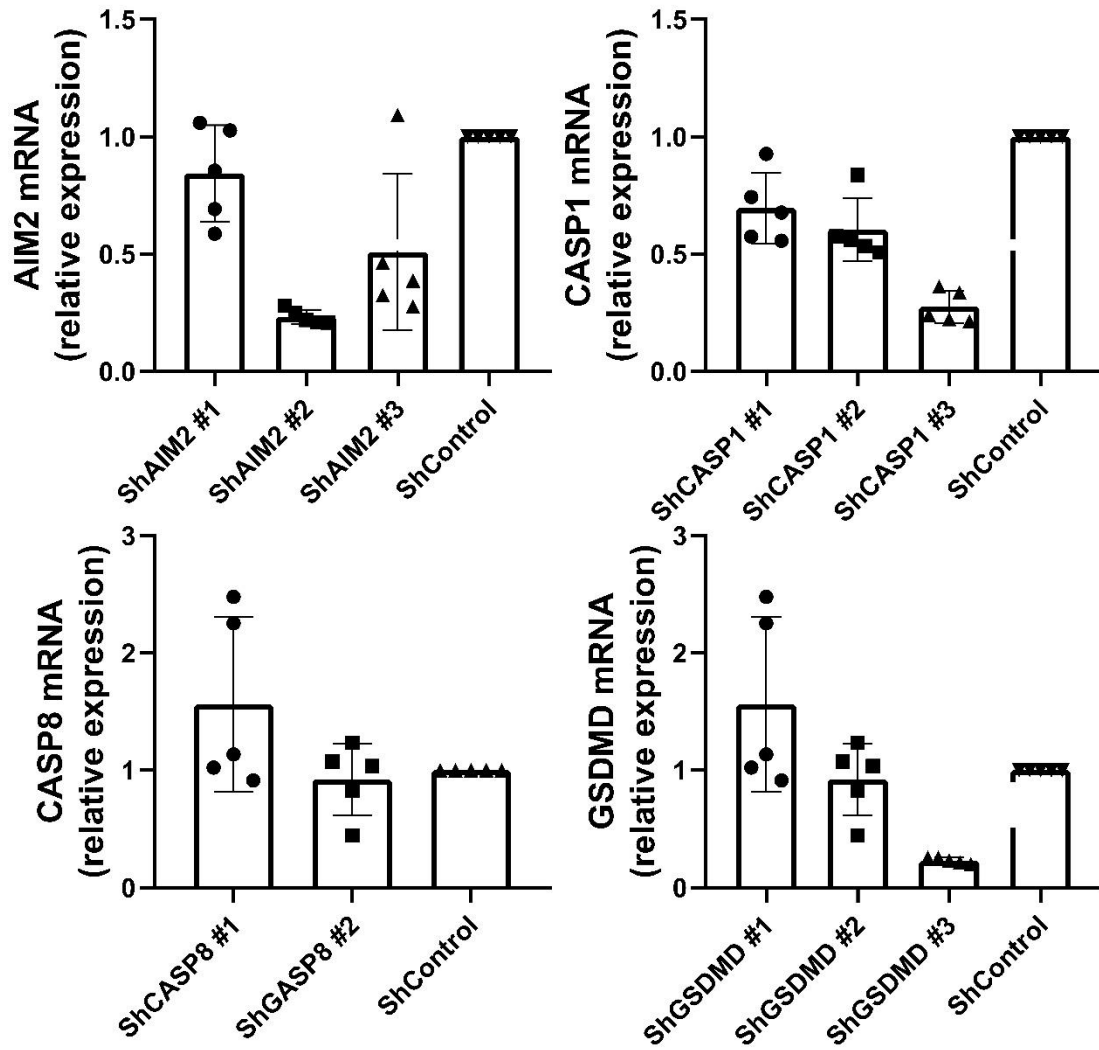

Fig. S4 Transfection efficiency for knock-down was determined via qRT-PCR. ShRNA knockdown efficiency was identified by detecting the levels of AIM2, caspase-1, caspase-8 and GSDMD mRNA through qRT-PCR (n=5 per group). Data were normalized to actin mRNA expression. For each gene, 2-3 shRNA sequences were designed, and the one had the highest knockdown efficiency (shAIM2#2/shCasp1#3/shGSDMD#3/shCasp8#2) was chosen for shRNA plasmid transfection.

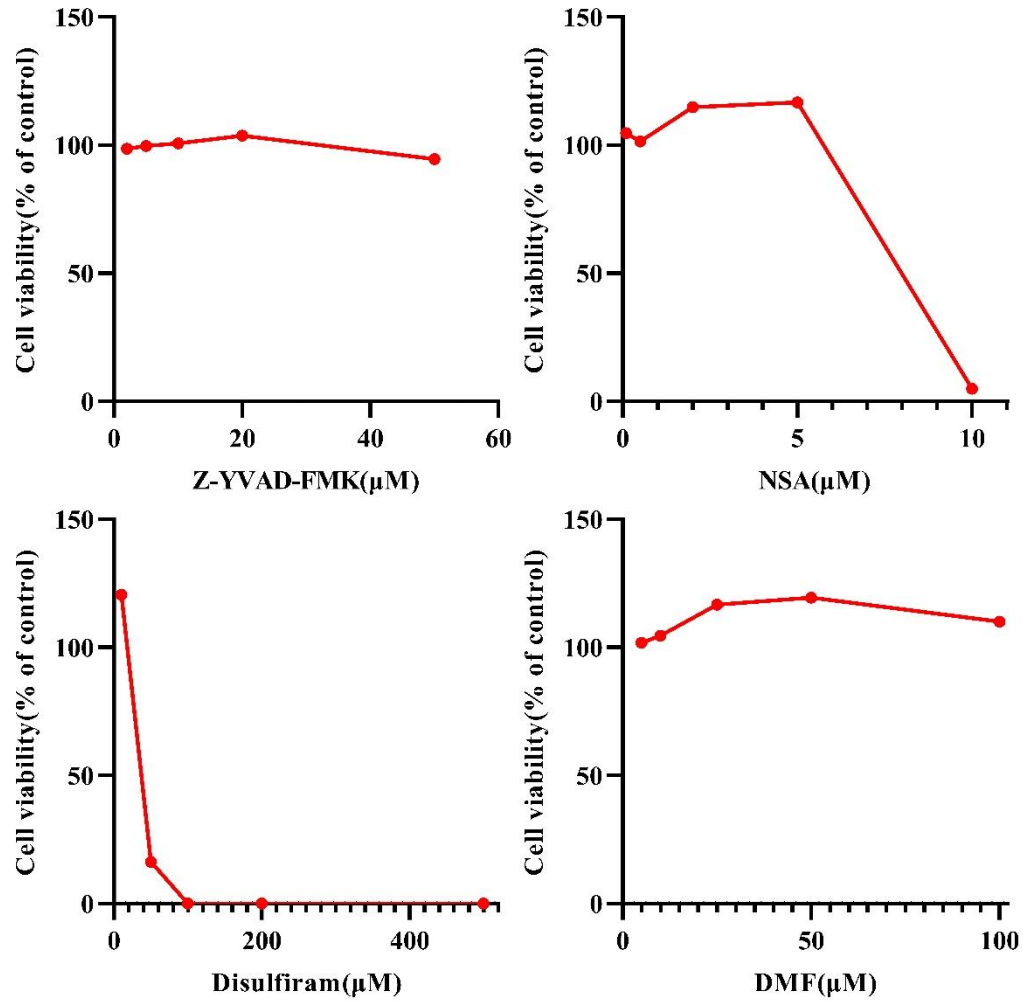

Fig. S5 Cell viability was evaluated in human primary keratinocytes treated with diverse concentrations of inhibitors Z-YVAD-FMK, NSA, disulfiram and DMF via Cell Counting Kit-8. The concentration range without any effect on cell viability was used for the inhibition of pyroptosis in human primary keratinocytes.

**Supplementary table 1. Primer sequences for real-time quantitative PCR.**

|                   | Forward 5'-3'            | Reverse 5'-3'            |
|-------------------|--------------------------|--------------------------|
| Homo AIM2         | TCAAGCTGAAATGAGTCCTGC    | CTTGGGTCTCAAACGTGAAGG    |
| Homo NALP1        | CCACAACCCTCTGTCTACATTAC  | GCCCCATCTAACCCATGCTTC    |
| Homo NLRP3        | CGTGAGTCCCATTAAGATGGAGT  | CCCGACAGTGGATATAGAACAGA  |
| Homo NLRC4        | TGCCCAGAAATCGAAGCCC      | GGCACCAAAC TGCCGTATG     |
| Homo ASC          | TGGATGCTCTGTACGGGAAG     | CCAGGCTGGTGTGAAACTGAA    |
| Homo caspase 1    | TTTCCGCAAGGTTTCGATTTTCA  | GGCATCTGCGCTCTACCATC     |
| Homo caspase 8    | AAAAGCAAACCTCGGGATAC     | CCAAGTGTGTTCCATTCTCTGTC  |
| Homo GSDMD        | GGACAGGCAAAGATCGCAG      | CACTCAGCGAGTACACATTCATT  |
| Homo GSDME        | CCCAGGATGGACCATTAAAGTGT  | GGTTCAGGACCATGAGTAGTT    |
| Homo IL-1 $\beta$ | ATGATGGCTTATTACAGTGGCAA  | GTCGGAGATTCGTAGCTGGA     |
| Homo IL-18        | ACAGCTTCGGGAAGAGGAAAGGAA | TGTCTTCTACTGGTTCAGCAGCCA |
| Homo Actin        | TCATGAAGTGTGACGTGGACATC  | CAGGAGGAGCAATGATCTTGATCT |

**Supplementary table 2. The ShRNA sequences used for transfection.**

| Name     | 5'-3'                   |
|----------|-------------------------|
| AIM2 #1  | CCCGAAGATCAACACGCTTCA   |
| AIM2 #2  | GGAACAATTGTGAATGGTTTG*  |
| AIM2 #3  | GCAAAC TACATACTGCAAA    |
| CASP1 #1 | GAAGACTCATTGAACATAT     |
| CASP1 #2 | AAGAGATCCTTCTGTAAAGGT   |
| CASP1 #3 | CCAGATATACTACAAC TCAAT* |
| GSDMD #1 | GTGTGTCAACCTGTCTATCAA   |
| GSDMD #2 | CCTTCTCTTCCCGGATAAGAA   |
| GSDMD #3 | GGAGACCATCTCCAAGGAACT*  |
| CASP8 #1 | GGAACAAC TGGACAGTGAAGA  |
| CASP8 #2 | GGGTCATGCTCTATCAGATT*   |

\*Used for subsequent experiments.
